# Supplementary material
Source: PubMed Central journal article supplement (PMC2837170)

# Supplemental Figure 1

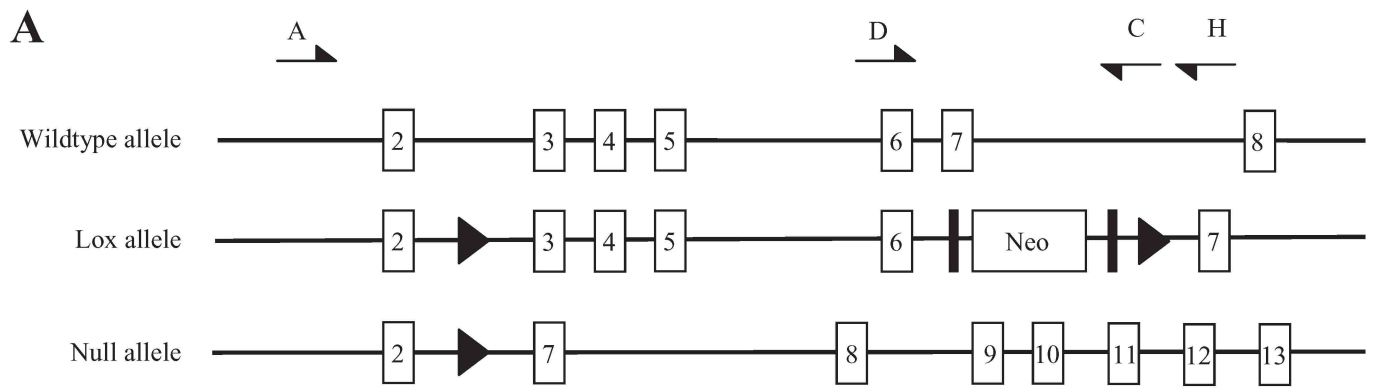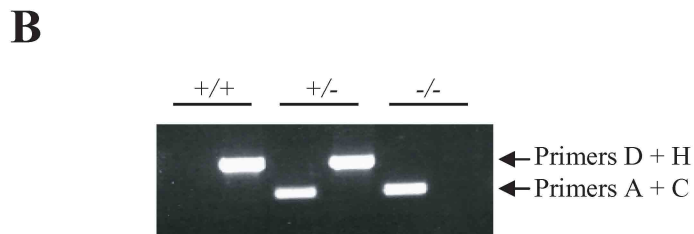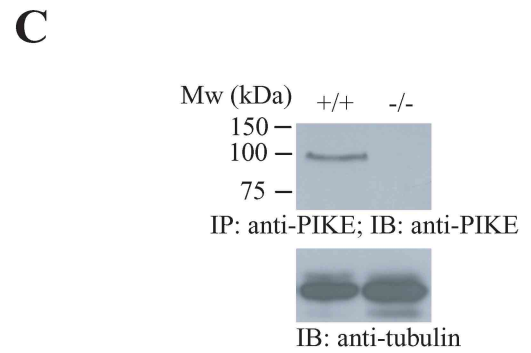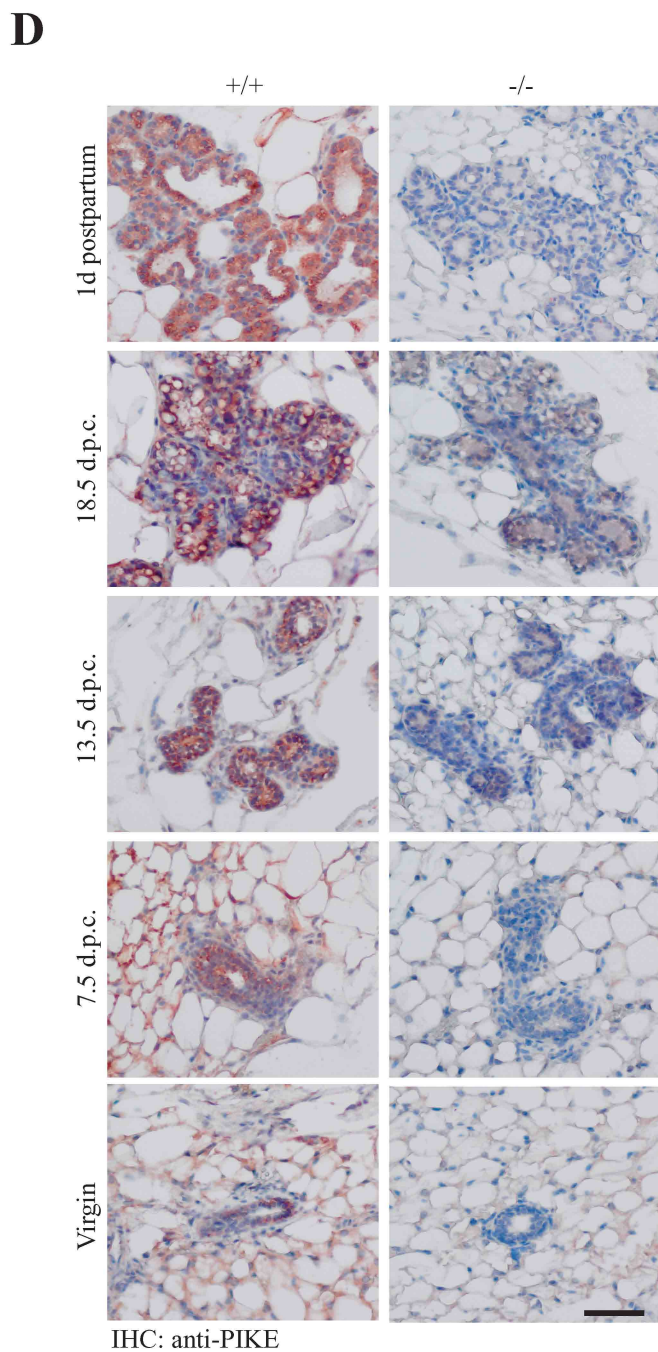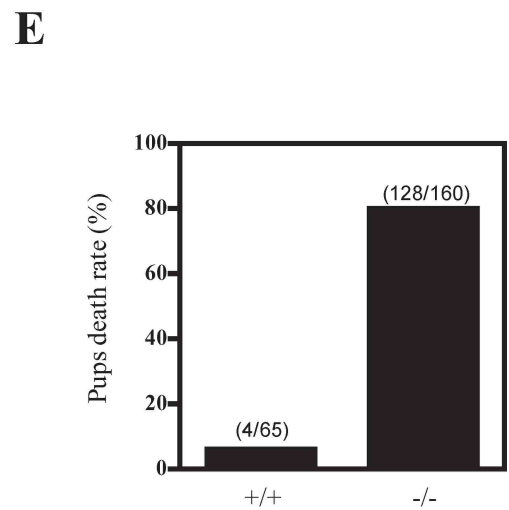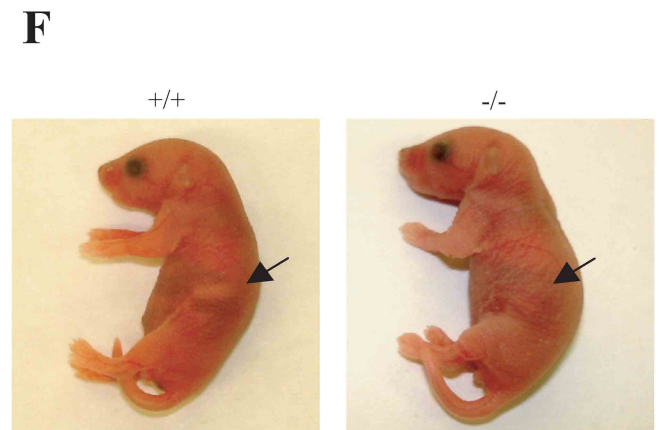

# Supplemental Figure 2

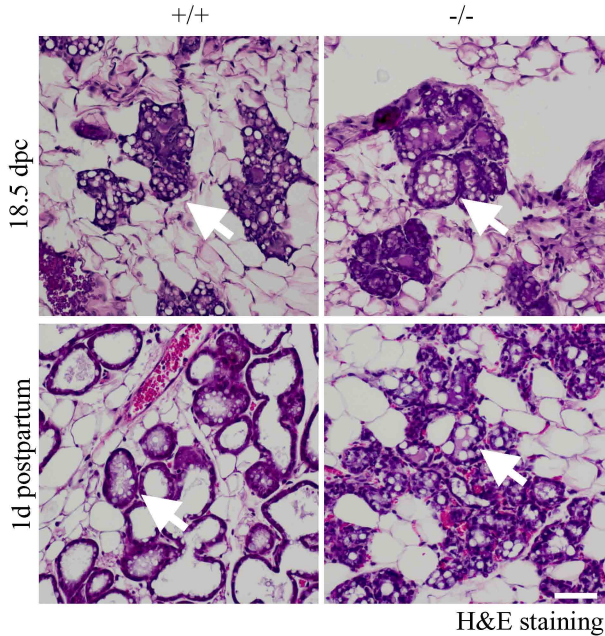

# Supplemental Figure 3

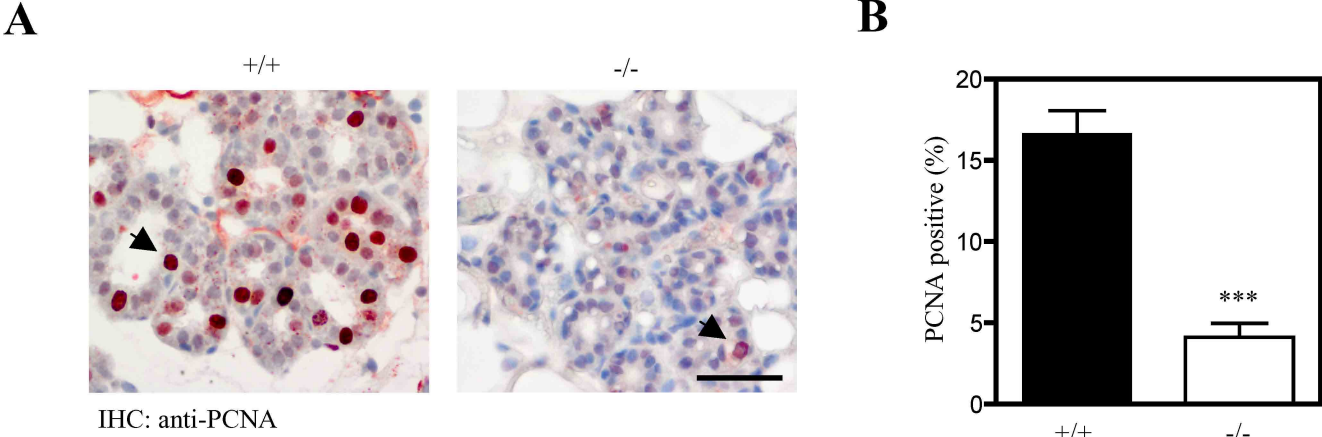

# Supplemental Figure 4

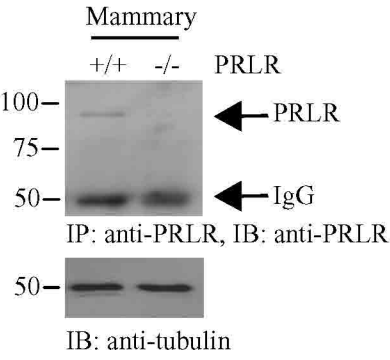

Supplemental Figure 5

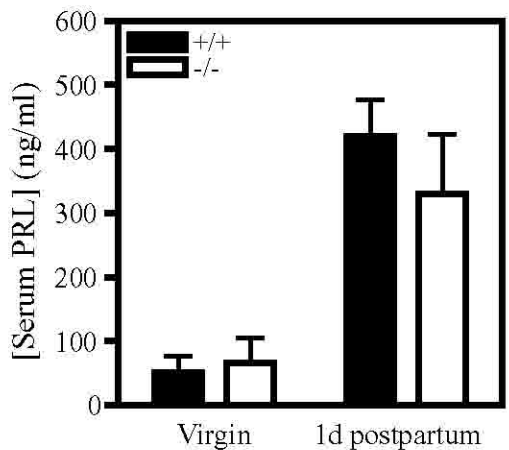

# Supplemental Figure 6

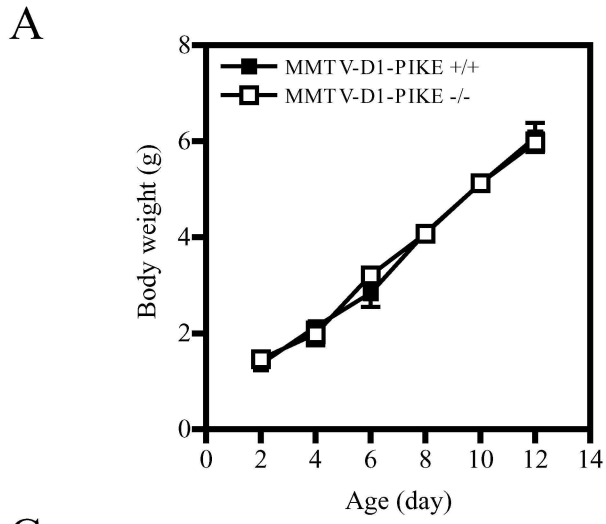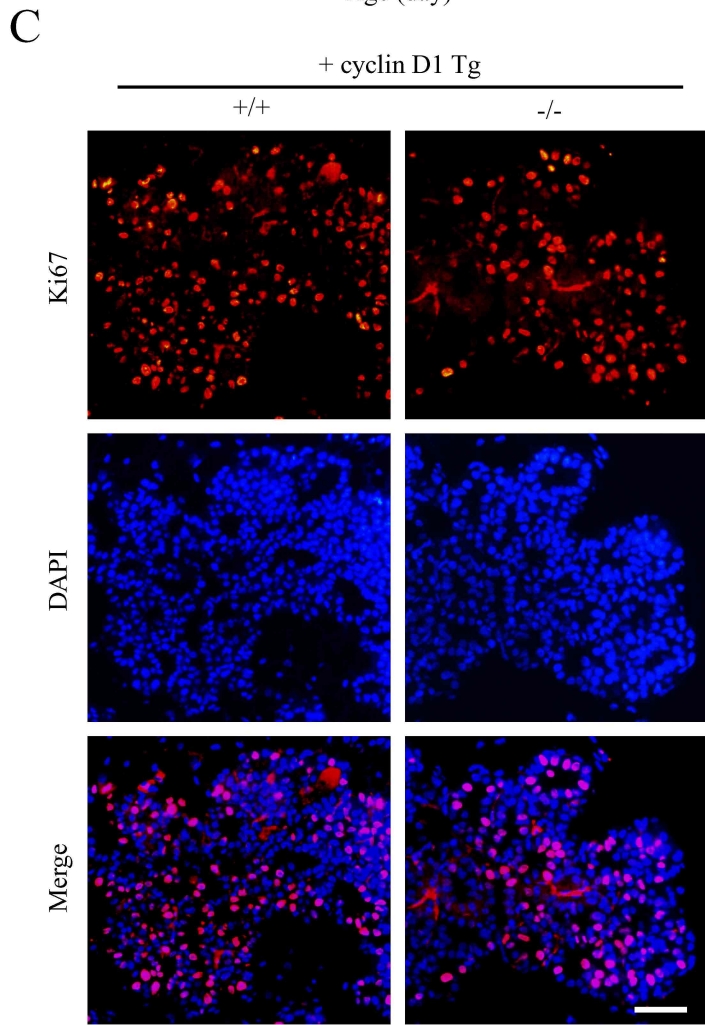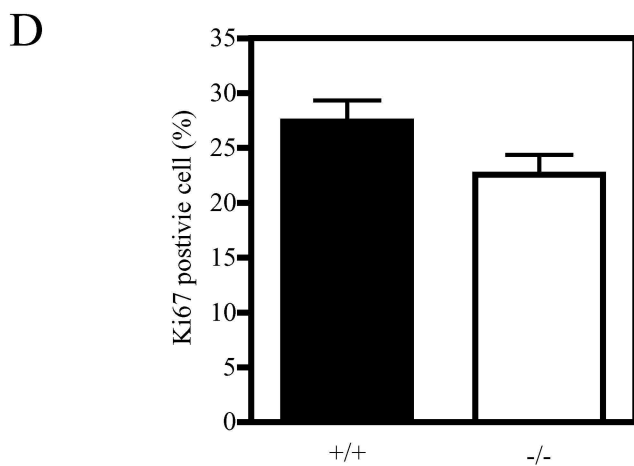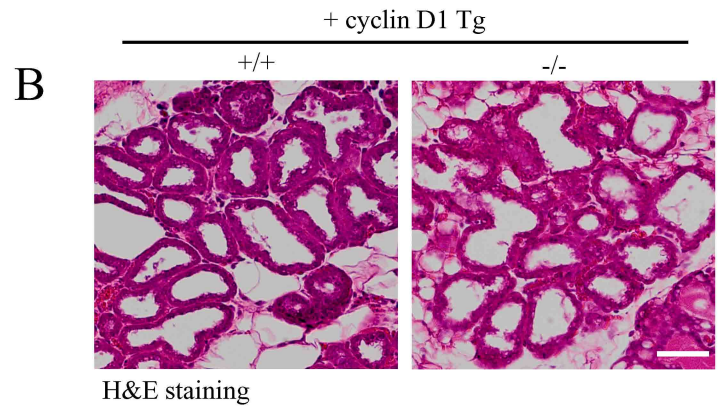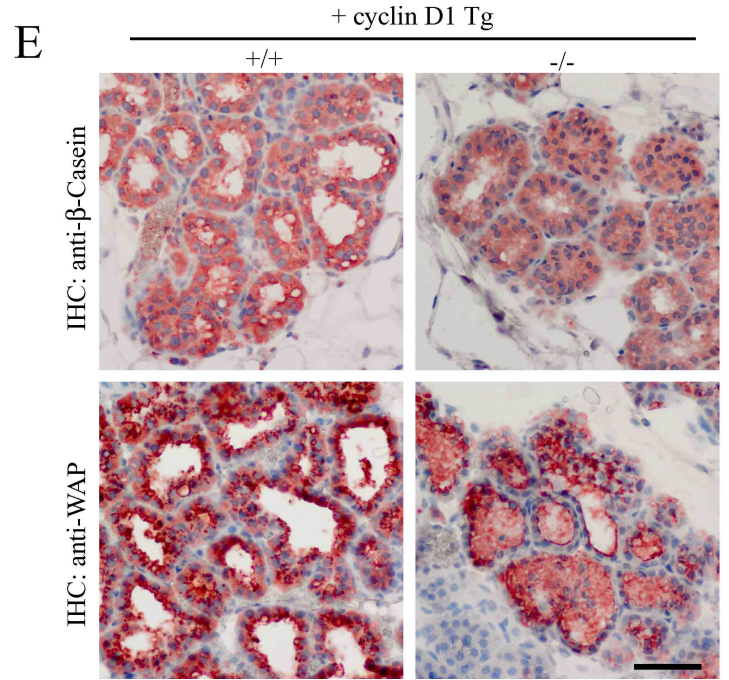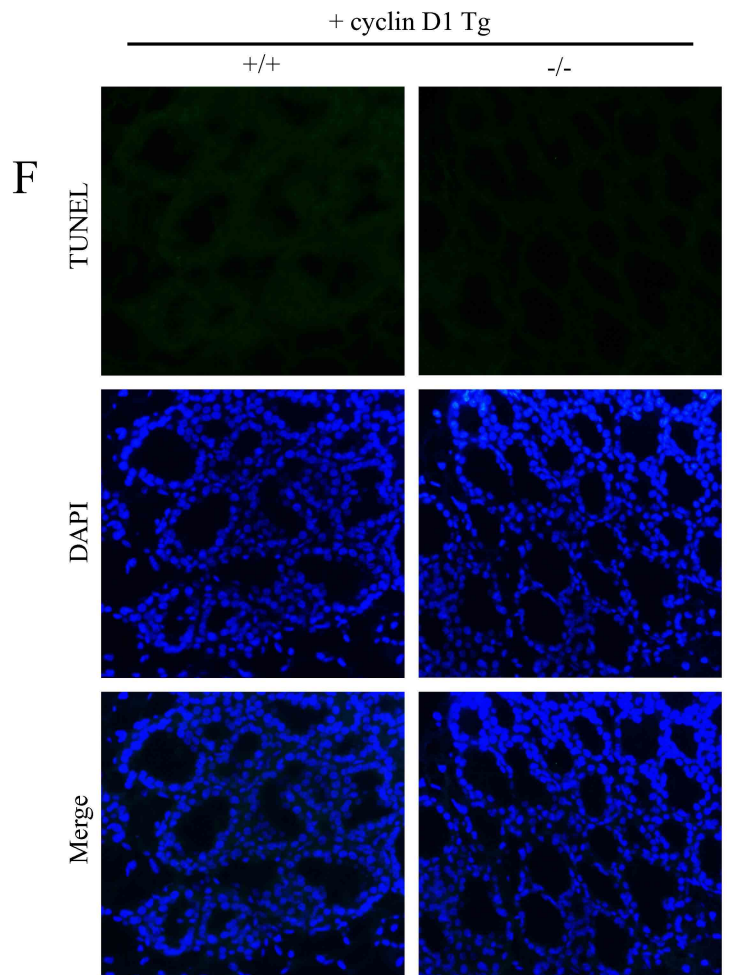

Supplement: emboj2009406s1.pdf [file emboj2009406s1.pdf]
